# Supplementary material for: Literature Review and Comparison of Two Statistical Methods to Evaluate the Effect of Botulinum Toxin Treatment on Gait in Children with Cerebral Palsy
Source: PubMed Central journal article supplement (PMC4816309; doi:10.1371/journal.pone.0152697), 2016-03-31
Supplement: pone.0152697.s006.pdf [file pone.0152697.s006.pdf]

**S4 Table. Kinematic ankle features extracted from 26 papers, identified through systematic literature search**

|                       | [1] | [2] | [3] | [4] | [5] | [6] | [7] | [8] | [9] | [10] | [11] | [12] | [13] | [14] | [15] | [16] | [17] | [18] | [19] | [20] | [21] | [22] | [23] | [24] | [25] | [26] |   |
|-----------------------|-----|-----|-----|-----|-----|-----|-----|-----|-----|------|------|------|------|------|------|------|------|------|------|------|------|------|------|------|------|------|---|
| Angle at IC           | v   |     | x   |     |     | v   |     | v   | x   | v    | v    | x    |      |      |      | v    | v    | v    |      | v    |      |      |      |      |      |      | v |
| Angles during 1R      |     |     |     |     |     |     |     | v   |     |      |      |      |      |      | v    |      | x    |      |      |      |      | v    |      |      |      |      |   |
| DF angle at 50% of St |     |     |     |     | v   |     |     |     |     |      |      |      |      |      |      |      |      |      |      |      |      |      |      |      |      |      |   |
| DF ankle at TSt       |     |     |     |     |     |     |     |     |     |      |      |      |      |      |      |      |      |      | v    |      |      |      |      |      |      |      |   |
| Timing Max. DF in St  |     |     |     |     |     |     |     | v   |     |      |      |      |      |      |      |      |      | v    |      |      |      |      |      |      |      | v    |   |
| Max. DF angle in St   | v   | v   | x   | v   | v   | v   |     | v   | x   | v    | v    | v    | v    | v    | v    | v    | v    | v    | v    | v    | v    | v    | v    |      |      | v    | v |
| Max. PF angle         |     |     |     |     |     | v   |     |     |     |      |      | x    |      |      |      |      |      |      |      |      |      |      |      |      |      |      |   |
| DF angle during PSw   |     |     |     |     |     |     |     |     |     |      |      |      |      |      |      |      |      |      |      |      |      |      |      |      |      |      |   |
| DF angle at 50% of Sw |     |     |     |     | v   |     |     | v   |     | v    |      |      |      |      |      |      |      | v    |      |      |      |      |      |      |      |      |   |
| Max. DF angle in Sw   | v   |     |     | v   |     |     |     |     |     |      |      |      |      | v    |      |      | v    |      |      |      | v    | v    | v    |      |      |      |   |
| Max. PF angle in Sw   |     |     | x   |     |     |     |     |     |     |      |      |      |      |      |      | v    |      |      |      |      |      |      |      |      |      |      |   |
| ROM during Sw         |     |     |     |     |     |     |     | v   |     |      |      |      |      |      |      |      |      |      |      |      |      |      |      |      |      |      |   |
| ROM during toe-off    |     |     |     |     |     |     |     | x   | x   |      |      |      |      |      |      |      |      |      |      |      |      |      |      |      |      |      |   |
| ROM                   |     |     |     |     |     | x   |     |     |     |      |      | v    |      |      |      | v    |      |      | v    |      |      |      |      |      |      | x    |   |
| Mean rotation in St   |     |     |     |     |     |     |     | v   |     |      |      |      |      |      |      |      |      |      |      |      |      |      |      |      |      |      |   |

V = Significantly changed post-BTX-A treatment; X = Not significantly changed post-BTX-A treatment; Max. = Maximal; ROM = Range Of Motion; IC = initial contact; 1R = first rocker; St = stance; Sw = swing; TSt = terminal stance; PSw = pre-swing; DF = dorsiflexion; PF = plantarflexion.

## References

- [1] J. D. Ackman, B. S. Russman, S. S. Thomas, C. E. Buckon, M. D. Sussman, P. Masso, et al., "Comparing botulinum toxin A with casting for treatment of dynamic equinus in children with cerebral palsy.," *Dev. Med. Child Neurol.*, vol. 47, no. 9, pp. 620–7, Sep. 2005.
- [2] M. S. Bang, S. G. Chung, S. B. Kim, and S.-J. Kim, "Change of dynamic gastrocnemius and soleus muscle length after block of spastic calf muscle in cerebral palsy.," *Am. J. Phys. Med. Rehabil.*, vol. 81, no. 10, pp. 760–4, Oct. 2002.
- [3] M. Bottos, M. G. Benedetti, P. Salucci, V. Gasparroni, and S. Giannini, "Botulinum toxin with and without casting in ambulant children with spastic diplegia: A clinical and functional assessment," *Dev. Med. Child Neurol.*, vol. 45, no. 11, pp. 758–762, 2003.
- [4] R. N. Boyd, J. E. A. Graham, G. R. Nattrass, and H. K. Graham, "Medium-term response characterisation and risk factor analysis of botulinum toxin type A in the management of spasticity in children with cerebral palsy," *Eur. J. Neurol.*, vol. 6, no. 4, pp. S37–S45, Nov. 1999.
- [5] R. N. Boyd, V. Pliatsios, R. Starr, R. Wolfe, and H. K. Graham, "Biomechanical transformation of the gastroc-soleus muscle with botulinum toxin A in children with cerebral palsy.," *Dev. Med. Child Neurol.*, vol. 42, no. 1, pp. 32–41, 2000.
- [6] I. S. Corry, A. P. Cosgrove, C. M. Duffy, S. McNeill, T. C. Taylor, and H. K. Graham, "Botulinum toxin a compared with stretching casts in the treatment of spastic equinus: A randomised prospective trial," *J. Pediatr. Orthop.*, vol. 18, no. 3, pp. 304–311, 1998.
- [7] I. S. Corry, A. P. Cosgrove, C. M. Duffy, T. C. Taylor, and H. K. Graham, "Botulinum toxin A in hamstring spasticity," *Gait Posture*, vol. 10, no. 3, pp. 206–210, 1999.
- [8] K. Desloovere, G. Molenaers, I. Jonkers, J. De Cat, L. De Borre, J. Nijs, et al., "A randomized study of combined botulinum toxin type A and casting in the ambulant child with cerebral palsy using objective outcome measures.," *Eur. J. Neurol.*, vol. 8 Suppl 5, pp. 75–87, 2001.
- [9] K. Desloovere, G. Molenaers, J. De Cat, P. Pauwels, A. Van Campenhout, E. Ortibus, et al., "Motor function following multilevel botulinum toxin type A treatment in children with cerebral palsy," *Dev. Med. Child Neurol.*, vol. 49, no. 1, pp. 56–61, 2007.
- [10] C. Detrembleur, T. M. Lejeune, A. Renders, and P. Y. K. Van Den Bergh, "Botulinum toxin and short-term electrical stimulation in the treatment of equinus in cerebral palsy.," *Mov. Disord.*, vol. 17, no. 1, pp. 162–9, Jan. 2002.
- [11] M. Galli, M. Crivellini, G. C. Santambrogio, E. Fazzi, and F. Motta, "Short-term effects of 'botulinum toxin A' as treatment for children with cerebral palsy: Kinematic and kinetic aspects at the ankle joint," *Funct. Neurol.*, vol. 16, no. 4, pp. 317–323, 2001.
- [12] M. Galli, V. Cimolin, E. M. Valente, M. Crivellini, T. Ialongo, and G. Albertini, "Computerized gait analysis of botulinum toxin treatment in children with cerebral palsy.," *Disabil. Rehabil.*, vol. 29, no. 8, pp. 659–64, Apr. 2007.
- [13] R. M. Kay, S. A. Rethlefsen, A. Fern-Buneo, T. A. L. Wren, and D. L. Skaggs, "Botulinum toxin as an adjunct to serial casting treatment in children with cerebral

- palsy,” *J. Bone Jt. Surg. - Ser. A*, vol. 86, no. 11, pp. 2377–2384, 2004.
- [14] M. C. M. Klotz, S. I. Wolf, D. Heitzmann, S. Gantz, F. Braatz, and T. Dreher, “The influence of botulinum toxin a injections into the calf muscles on genu recurvatum in children with cerebral palsy pediatrics,” *Clin. Orthop. Relat. Res.*, vol. 471, no. 7, pp. 2327–2332, 2013.
- [15] J. H. Lee, I. Y. Sung, J. Y. Yoo, E. H. Park, and S. R. Park, “Effects of different dilutions of botulinum toxin type A treatment for children with cerebral palsy with spastic ankle plantarflexor: a randomized controlled trial.,” *J. Rehabil. Med.*, vol. 41, no. 9, pp. 740–5, Sep. 2009.
- [16] D. Metaxiotis, A. Siebel, and L. Doederlein, “Repeated botulinum toxin A injections in the treatment of spastic equinus foot.,” *Clin. Orthop. Relat. Res.*, no. 394, pp. 177–85, Jan. 2002.
- [17] G. Molenaers, K. Desloovere, J. De Cat, I. Jonkers, L. De Borre, P. Pauwels, et al., “Single event multilevel botulinum toxin type A treatment and surgery: similarities and differences.,” *Eur. J. Neurol.*, vol. 8 Suppl 5, pp. 88–97, Nov. 2001.
- [18] A. S. Papadonikolakis, M. D. Vekris, A. V Korompilias, J. P. Kostas, S. E. Ristanis, and P. N. Soucacos, “Botulinum A toxin for treatment of lower limb spasticity in cerebral palsy: Gait analysis in 49 patients,” *Acta Orthop. Scand.*, vol. 74, no. 6, pp. 749–755, 2003.
- [19] F. Polak, R. Morton, C. Ward, W. A. Wallace, L. Doderlein, and A. Siebel, “Double-blind comparison study of two doses of botulinum toxin A injected into calf muscles in children with hemiplegic cerebral palsy.,” *Dev. Med. Child Neurol.*, vol. 44, no. 8, pp. 551–5, Aug. 2002.
- [20] D. H. Sutherland, K. R. Kaufman, M. P. Wyatt, and H. G. Chambers, “Injection of botulinum A toxin into the gastrocnemius muscle of patients with cerebral palsy: A 3-dimensional motion analysis study,” *Gait Posture*, vol. 4, no. 4, pp. 269–279, 1996.
- [21] D. H. Sutherland, K. R. Kaufman, M. P. Wyatt, H. G. Chambers, and S. J. Mubarak, “Double-blind study of botulinum A toxin injections into the gastrocnemius muscle in patients with cerebral palsy,” *Gait Posture*, vol. 10, no. 1, pp. 1–9, 1999.
- [22] M. Svehlik, T. Kraus, G. Steinwender, E. B. Zwick, M. Ladecky, Z. Szabo, et al., “Repeated Multilevel Botulinum Toxin A Treatment Maintains Long-Term Walking Ability in Children with Cerebral Palsy,” *Ces. A Slov. Neurol. A Neurochir.*, vol. 75, no. 6, pp. 737–741, 2012.
- [23] N. S. Thompson, R. J. Baker, A. P. Cosgrove, I. S. Corry, and H. K. Graham, “Musculoskeletal modelling in determining the effect of botulinum toxin on the hamstrings of patients with crouch gait,” *Dev. Med. Child Neurol.*, vol. 40, no. 9, pp. 622–625, 1998.
- [24] J. Wissel, J. Muller, A. Baldauf, S. C. Ung, J. P. Ndayisaba, B. Stockl, et al., “Gait analysis to assess the effects of botulinum toxin type A treatment in cerebral palsy: an open-label study in 10 children with equinus gait pattern,” *Eur. J. Neurol.*, vol. 6, no. 4, pp. S63–S67, Nov. 1999.
- [25] E. B. . Zwick, M. . b Švehlík, G. . Steinwender, and W. E. . Linhart, “Short-term effects of botulinum toxin A and serial casting on triceps surae muscle length and equinus gait in children with cerebral palsy,” *Ces. a Slov. Neurol. a Neurochir.*, vol. 72, no. 6, pp. 553–558, 2009.

- [26] A. W. Zurcher, G. Molenaers, K. Desloovere, and G. Fabry, "Kinematic and kinetic evaluation of the ankle after intramuscular injection of botulinum toxin A in children with cerebral palsy," *Acta Orthop. Belg.*, vol. 67, no. 5, pp. 475–480, 2001.
